# Supplementary material
Source: PubMed Central journal article supplement (PMC5455065)

# Supplemental Figure 1

**A**

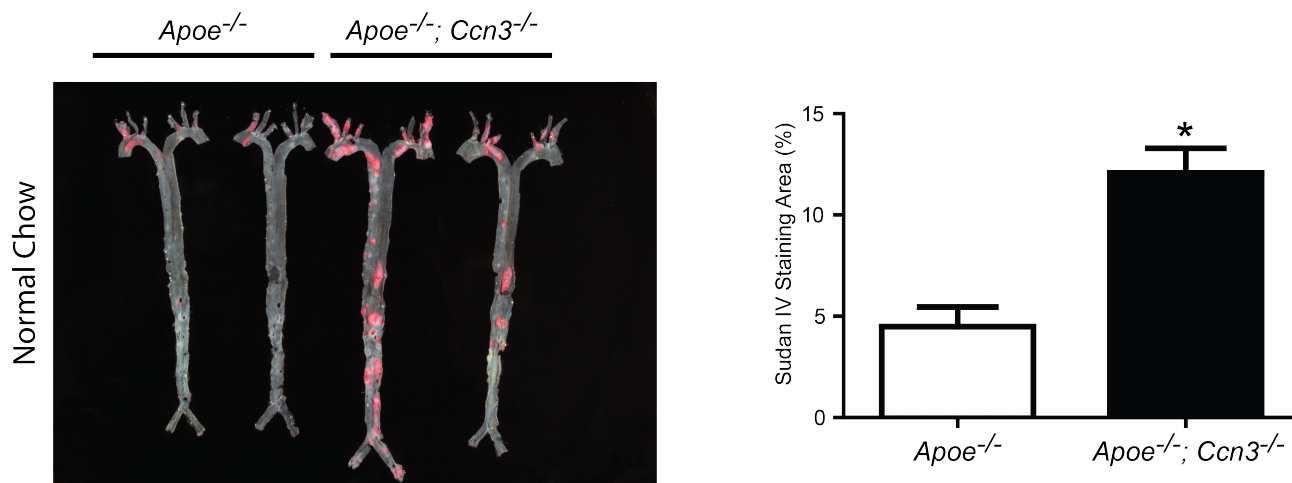

**B**

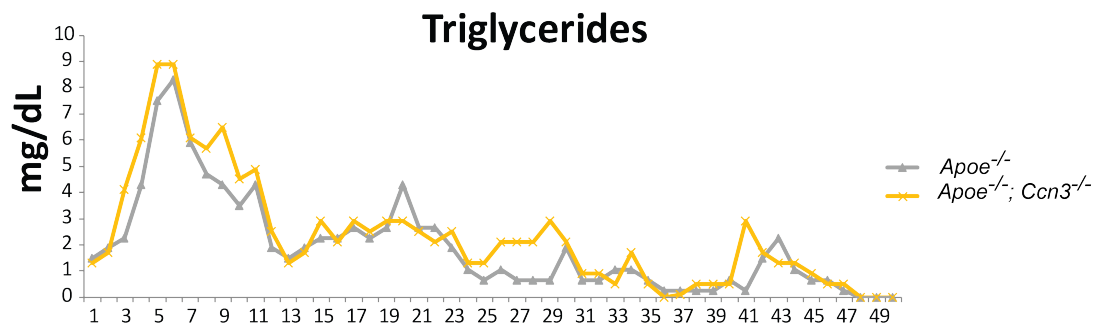

**C**

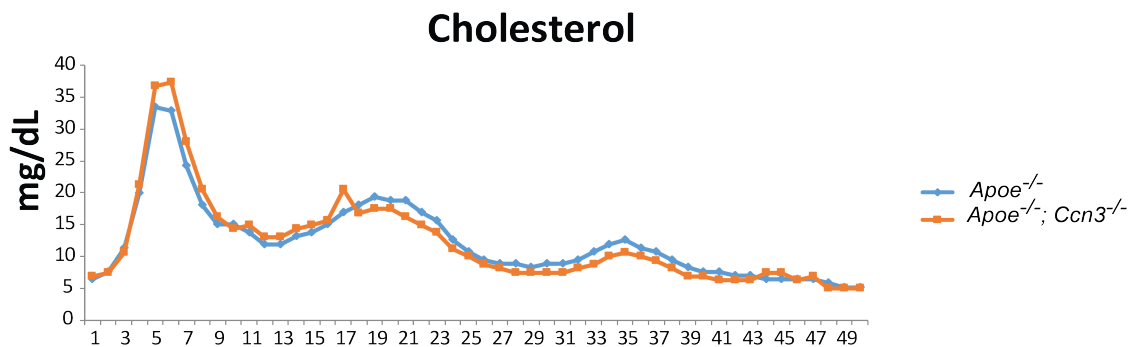

Supplement: mmc1.pdf [file mmc1.pdf]

# Supplemental Figure 2

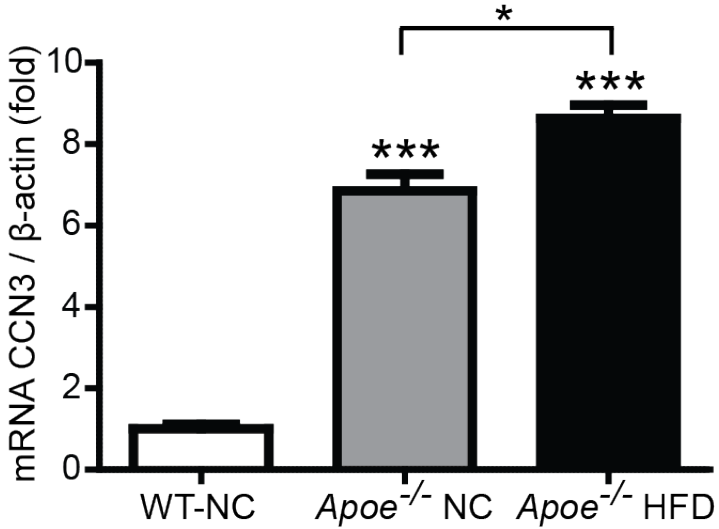

Supplement: mmc2.pdf [file mmc2.pdf]

# Supplemental Figure 3

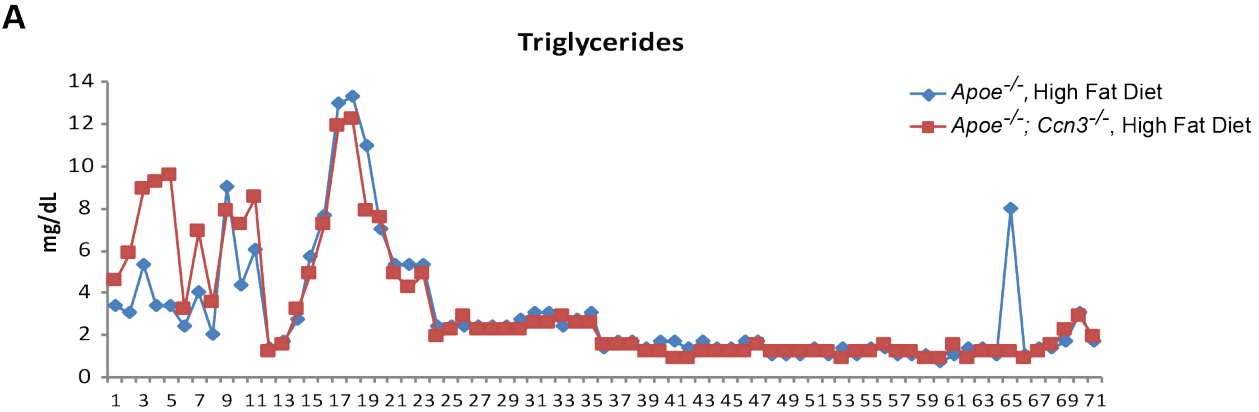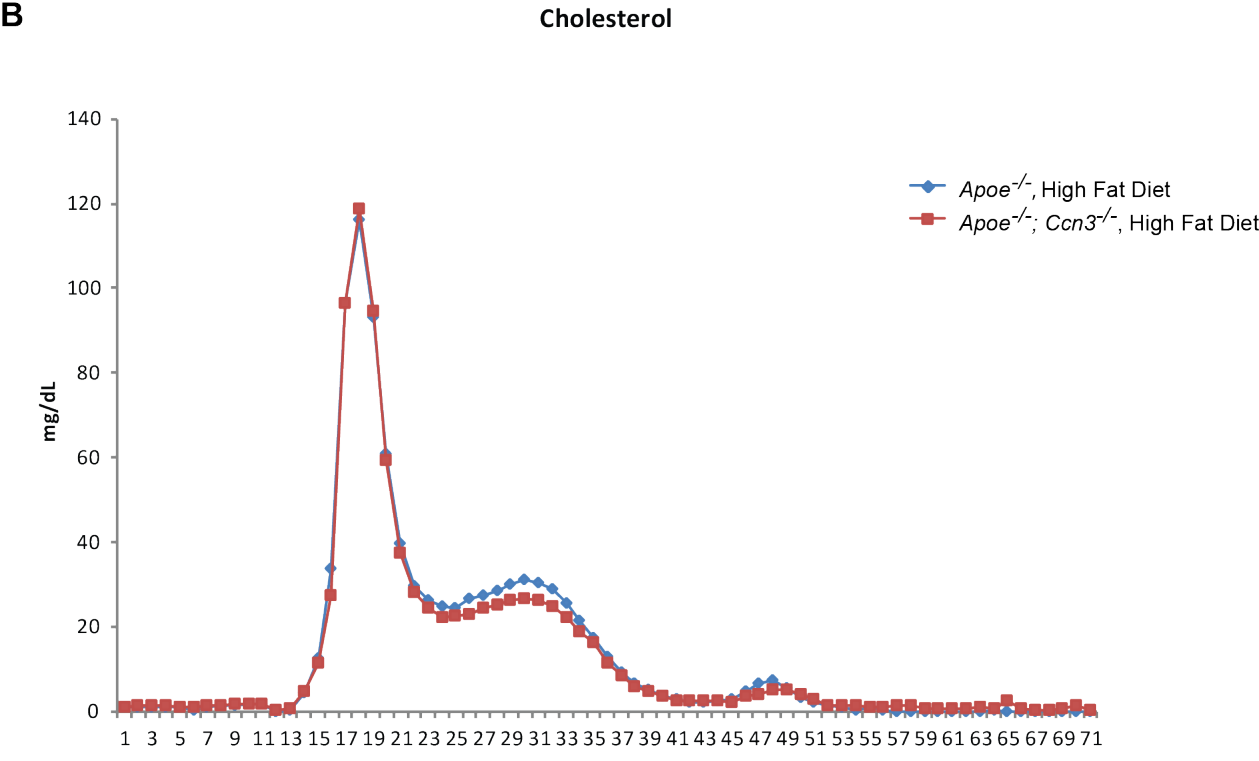

Supplement: mmc3.pdf [file mmc3.pdf]

# Supplemental Figure 4

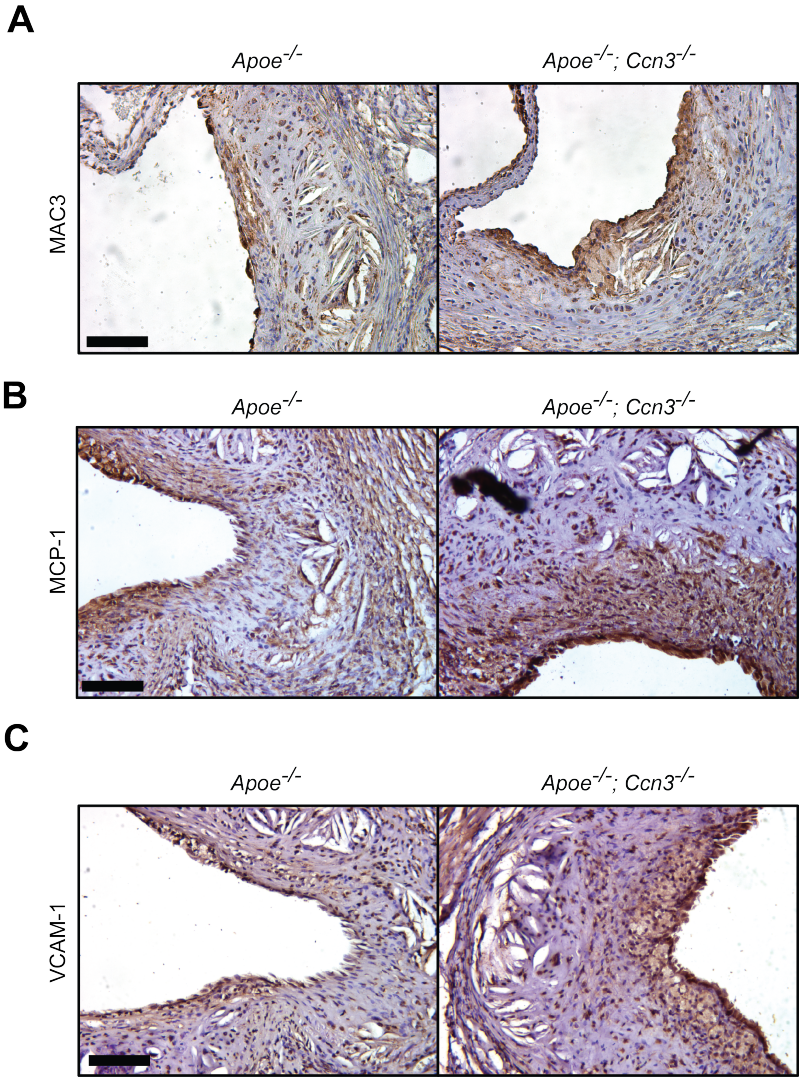

Supplement: mmc4.pdf [file mmc4.pdf]

# Supplemental Figure 5

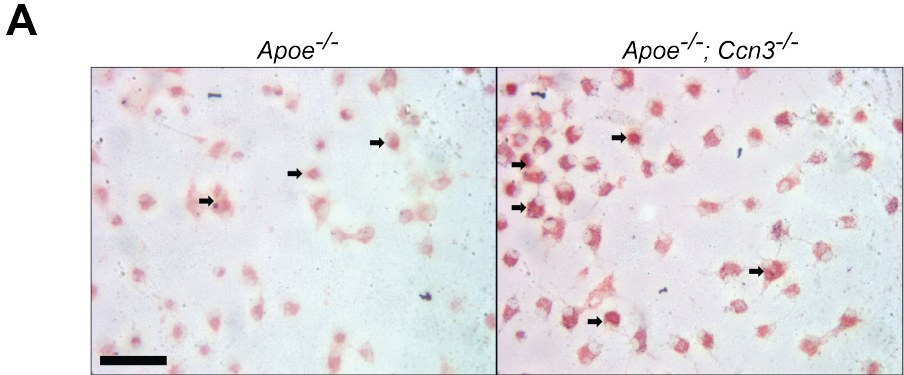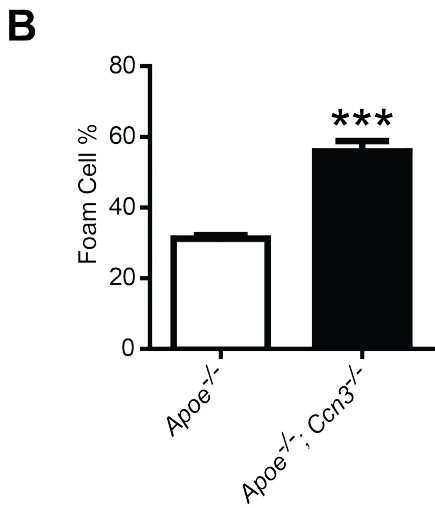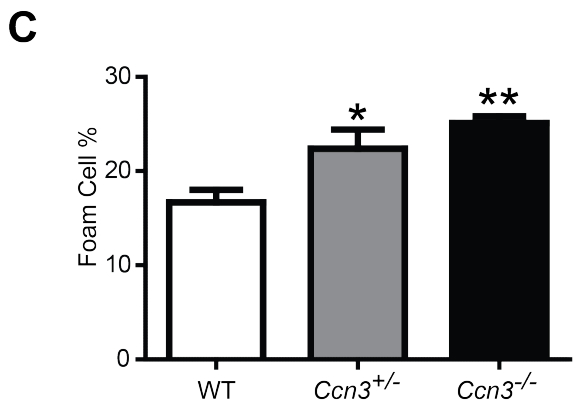

Supplement: mmc5.pdf [file mmc5.pdf]
